# Supplementary material
Source: PubMed Central journal article supplement (PMC9629364)
Supplement: NIHMS1841633-supplement-Supplementary_Figure_1.pdf [file NIHMS1841633-supplement-Supplementary_Figure_1.pdf]

Transgender and gender-diverse  
adolescents recruited prior to GAH  
n = 313 participants (109 DMAB, 204 DFAB)

History of GnRH analog use in early puberty  
n = 22 participants (17 DMAB, 5 DFAB)  
History of diabetes mellitus  
n = 5 participants (all DFAB)

Included in the analysis  
n = 286 participants (92 DMAB, 194 DFAB)
