# Supplementary material
Source: PubMed Central journal article supplement (PMC9629364)
Supplement: NIHMS1841633-supplement-Supplementary_Figure_3.pdf [file NIHMS1841633-supplement-Supplementary_Figure_3.pdf]

**A**

Participants Designated Male at Birth

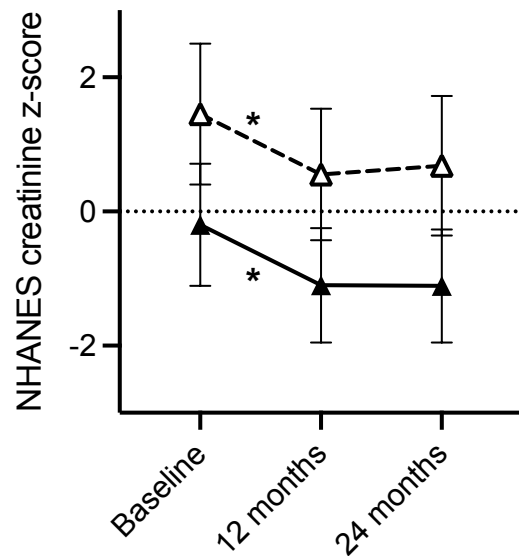**B**

Participants Designated Female at Birth

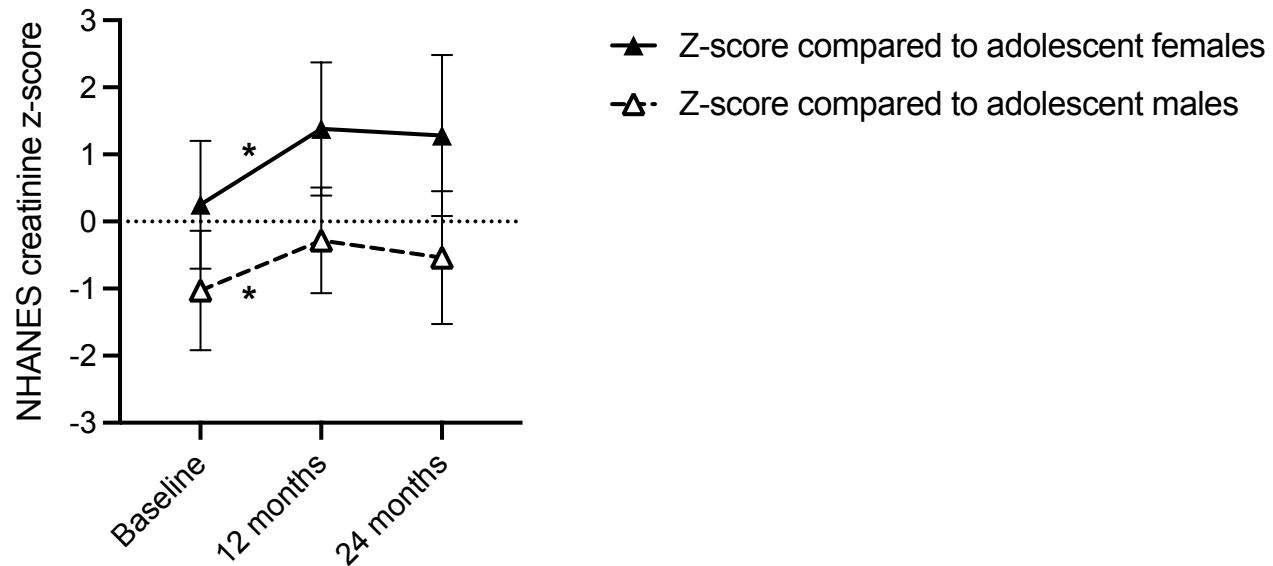

▲ Z-score compared to adolescent females  
 △ Z-score compared to adolescent males
