# Supplementary material
Source: PubMed Central journal article supplement (PMC9629364)

**A**

Participants Designated Male at Birth

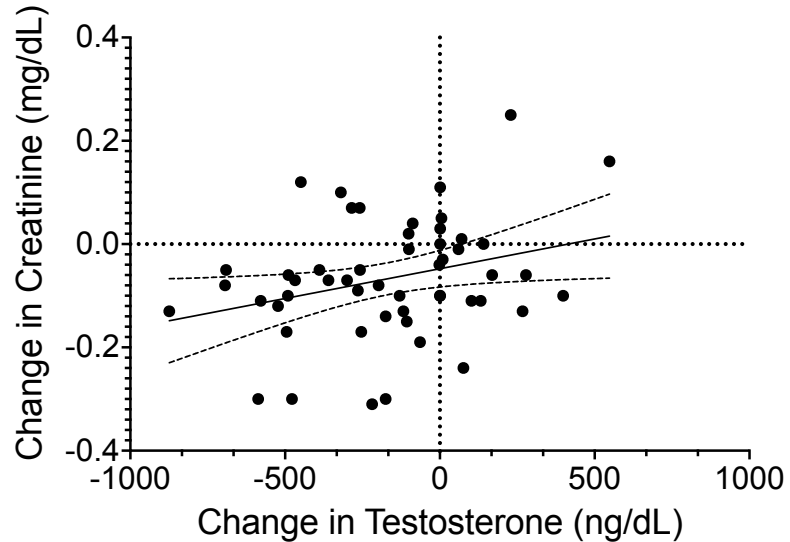**B**

Participants Designated Female at Birth

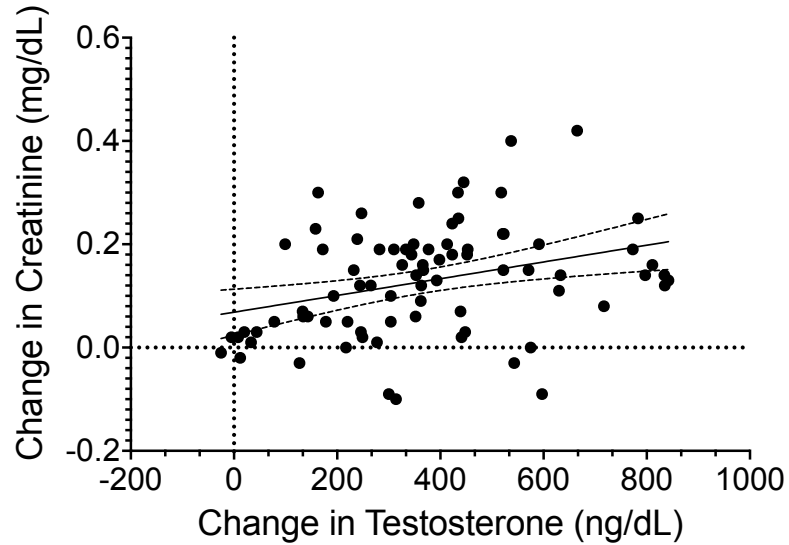

Supplement: NIHMS1841633-supplement-Supplementary_Figure_2.pdf [file NIHMS1841633-supplement-Supplementary_Figure_2.pdf]
